# Supplementary material
Source: ML conference proceedings conference paper supplement (https://openaccess.thecvf.com/content/CVPRW_2019/html/Muller_Learning_a_Controller_CVPRW_2019_paper.html)
Supplement: Supplementary file 1 [file 13-supp.pdf › 13-supp.pdf]

# Learning a Controller Fusion Network by Online Trajectory Filtering for Vision-based UAV Racing – Supplementary Material –

Matthias Müller\* Guohao Li\* Vincent Casser Neil Smith Dominik L. Michels Bernard Ghanem  
Visual Computing Center, King Abdullah University of Science and Technology, Saudi Arabia  
`{matthias.mueller.2, guohao.li, bernard.ghanem}@kaust.edu.sa`

Here we provide additional results and the recorded paths of the UAV networks and human pilots evaluations in the paper. All results were recorded as logs during testing inside Sim4CV [1] allowing plotting on the GUI track interface developed for the paper. The logs record stick input, position, orientation and velocity. These allow visualization of the performance of the pilot/network on the different tracks. Tables 1 and 2 show the detailed results for adaptation to different textures, lighting and environment conditions.

Figures 1,2,3,4,5,6,7 show the measured performance for all trained models and human pilots.

## References

- [1] Matthias Müller, Vincent Casser, Jean Lahoud, Neil Smith, and Bernard Ghanem. Sim4cv: A photo-realistic simulator for computer vision applications. *Int. J. Comput. Vision*, 126(9):902–919, Sept. 2018.

---

\*equal contribution

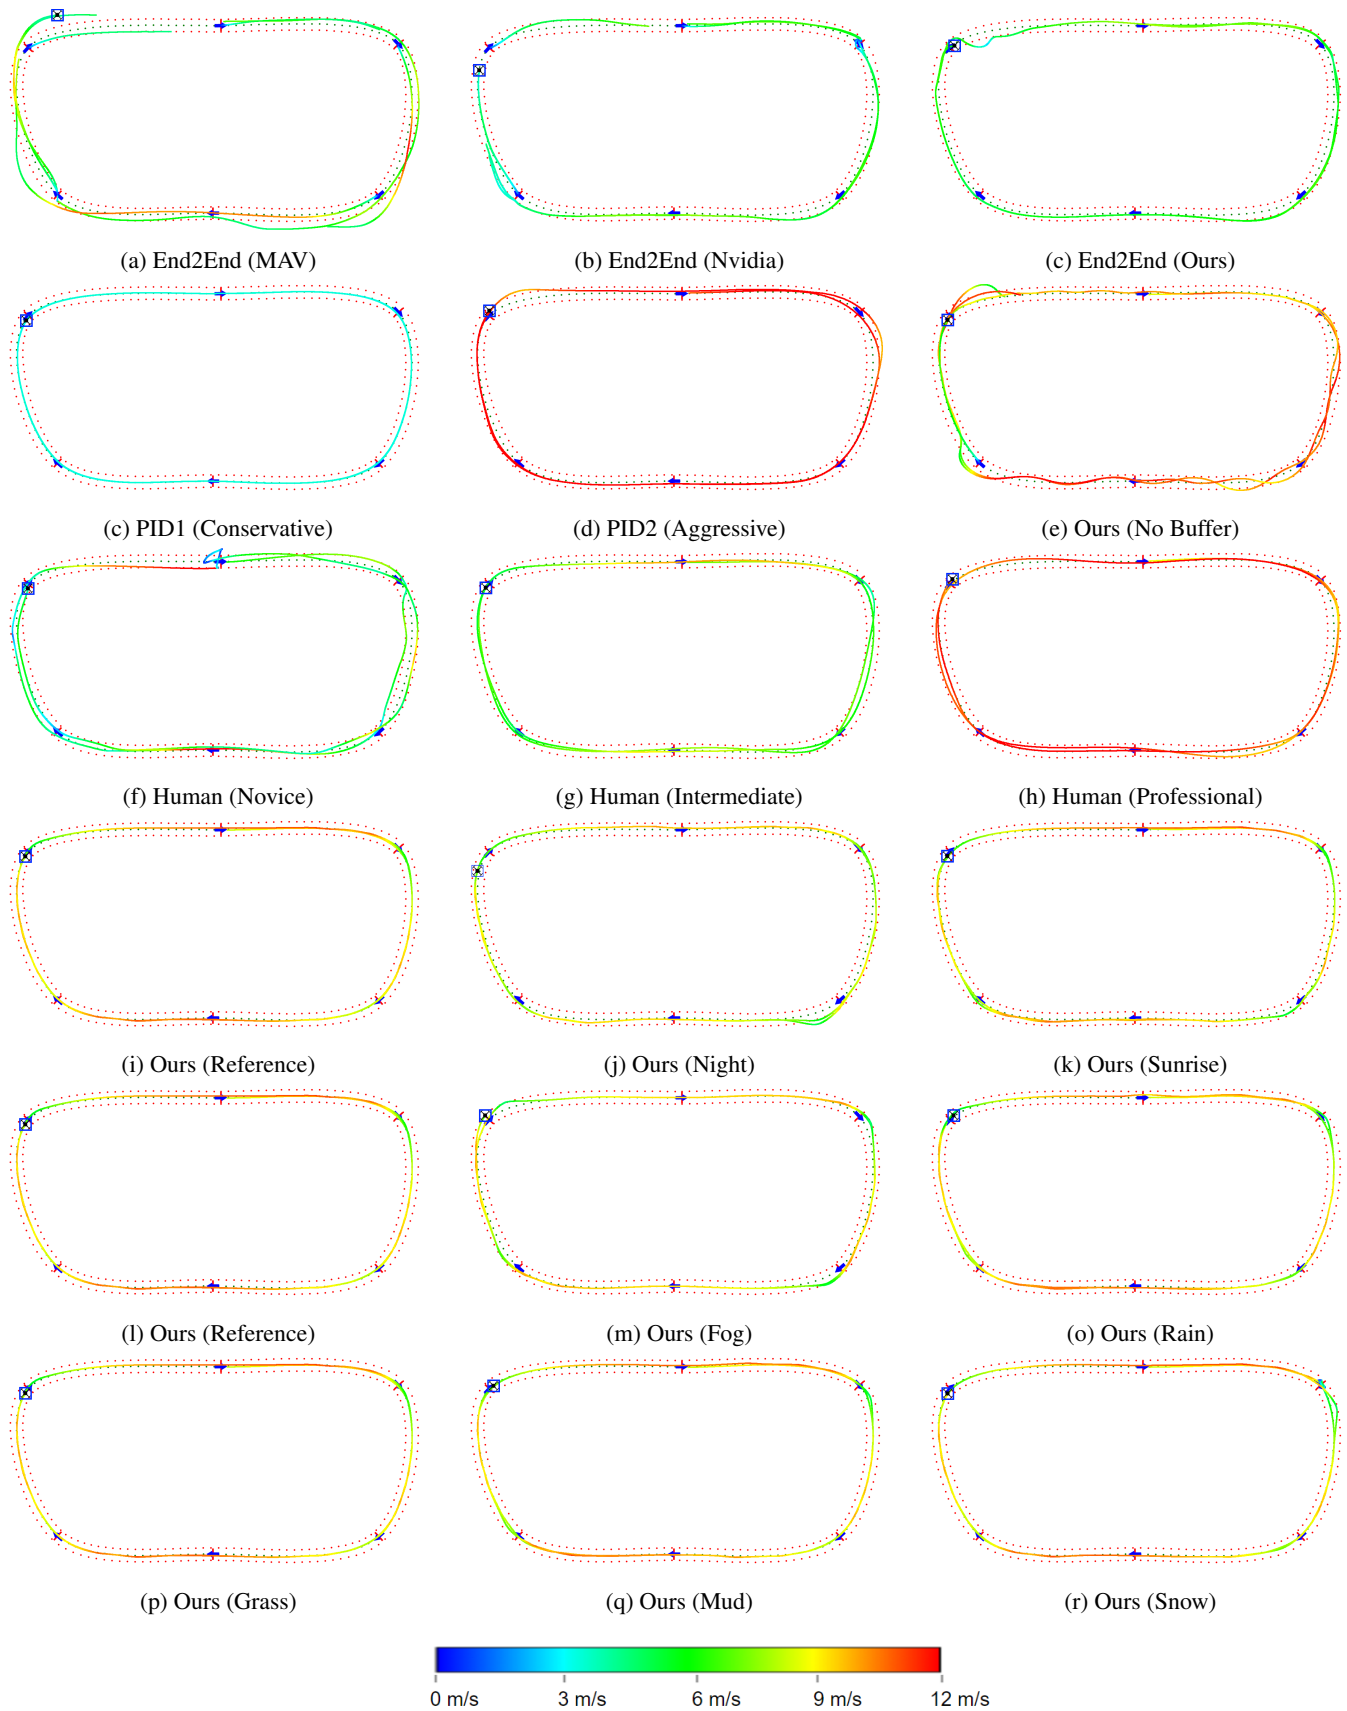

Figure 1: Qualitative results on track1. The color encodes speed as a heatmap, where blue corresponds to the minimum speed and red to the maximum speed.

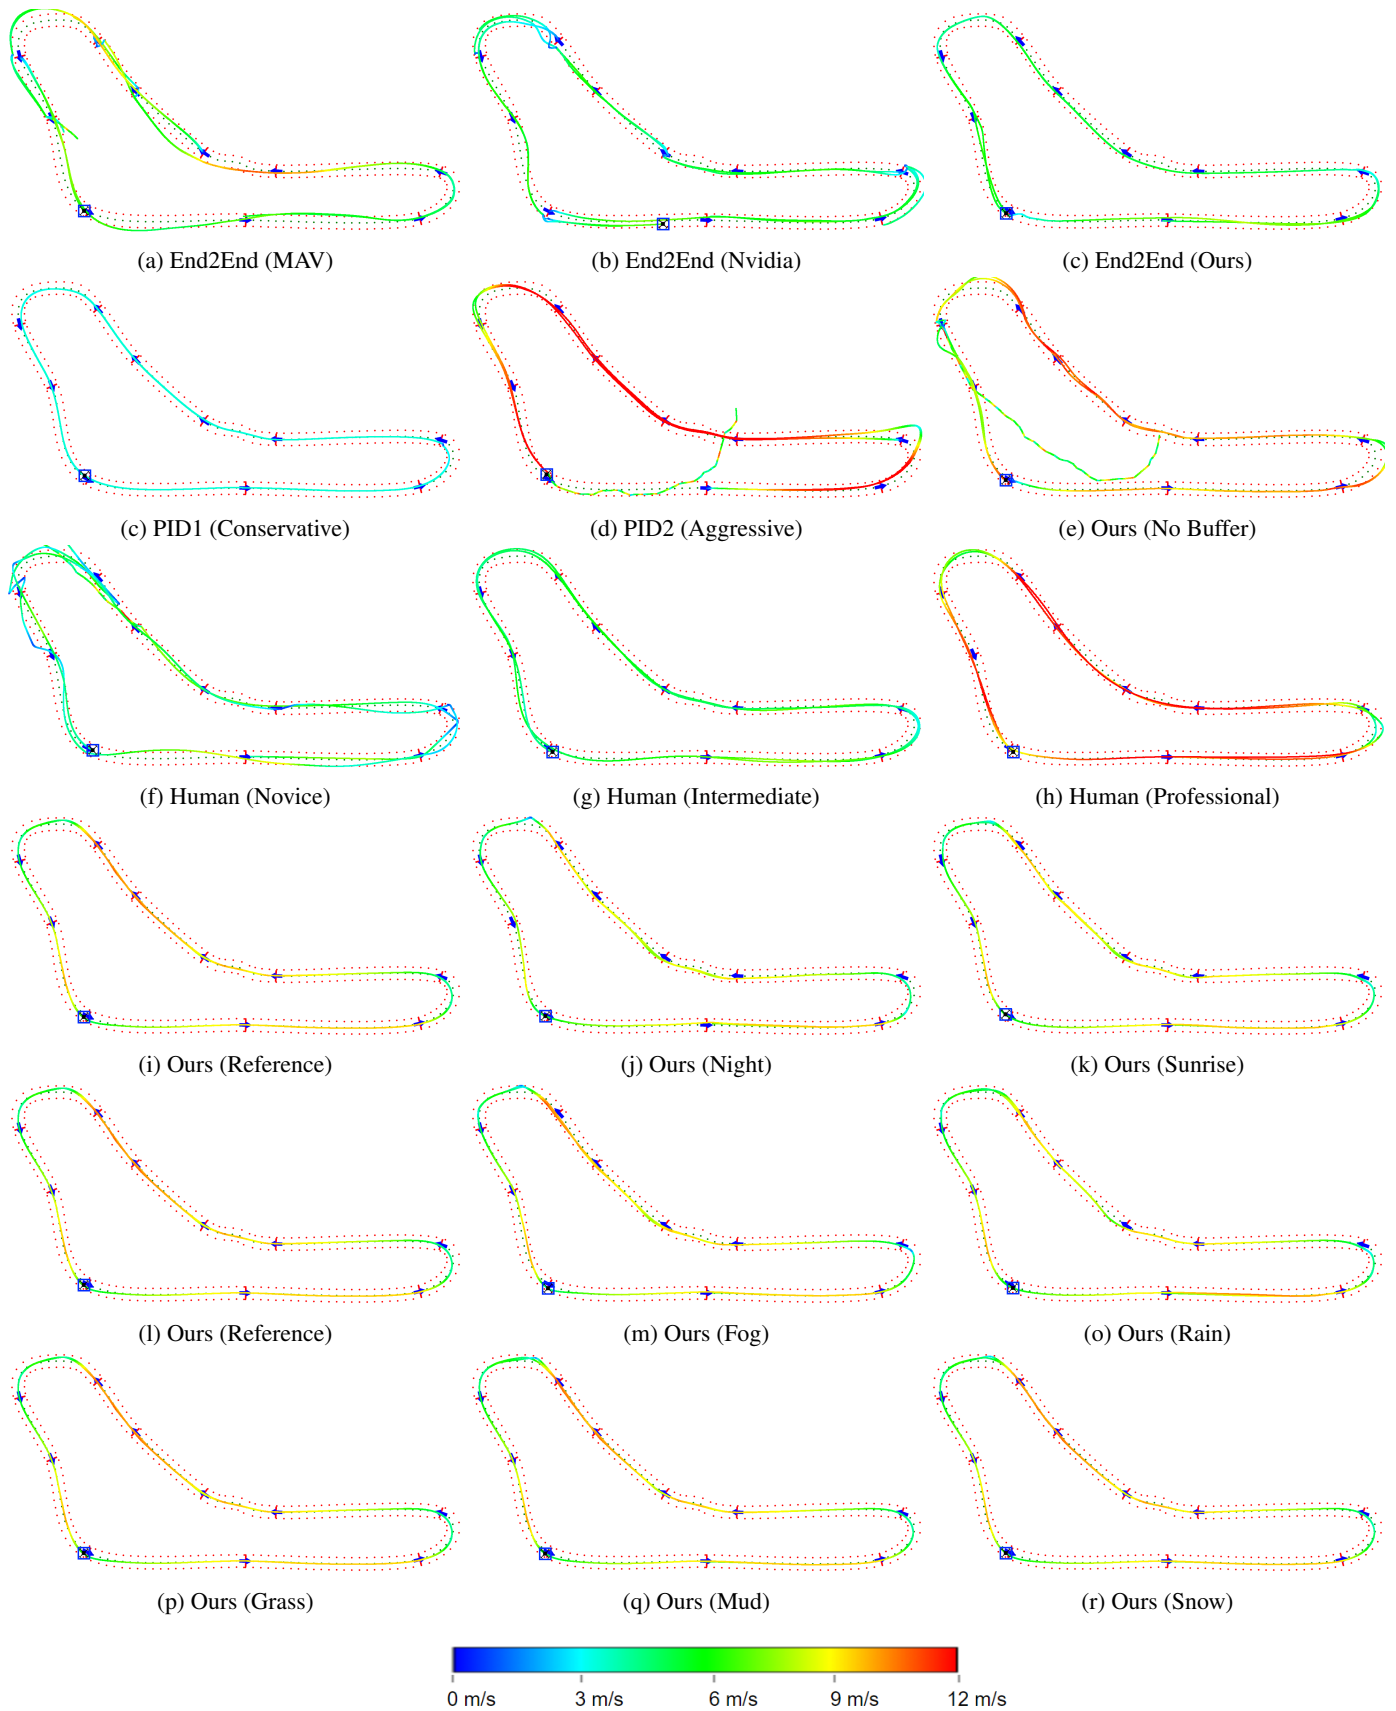

Figure 2: Qualitative results on track2. The color encodes speed as a heatmap, where blue corresponds to the minimum speed and red to the maximum speed.

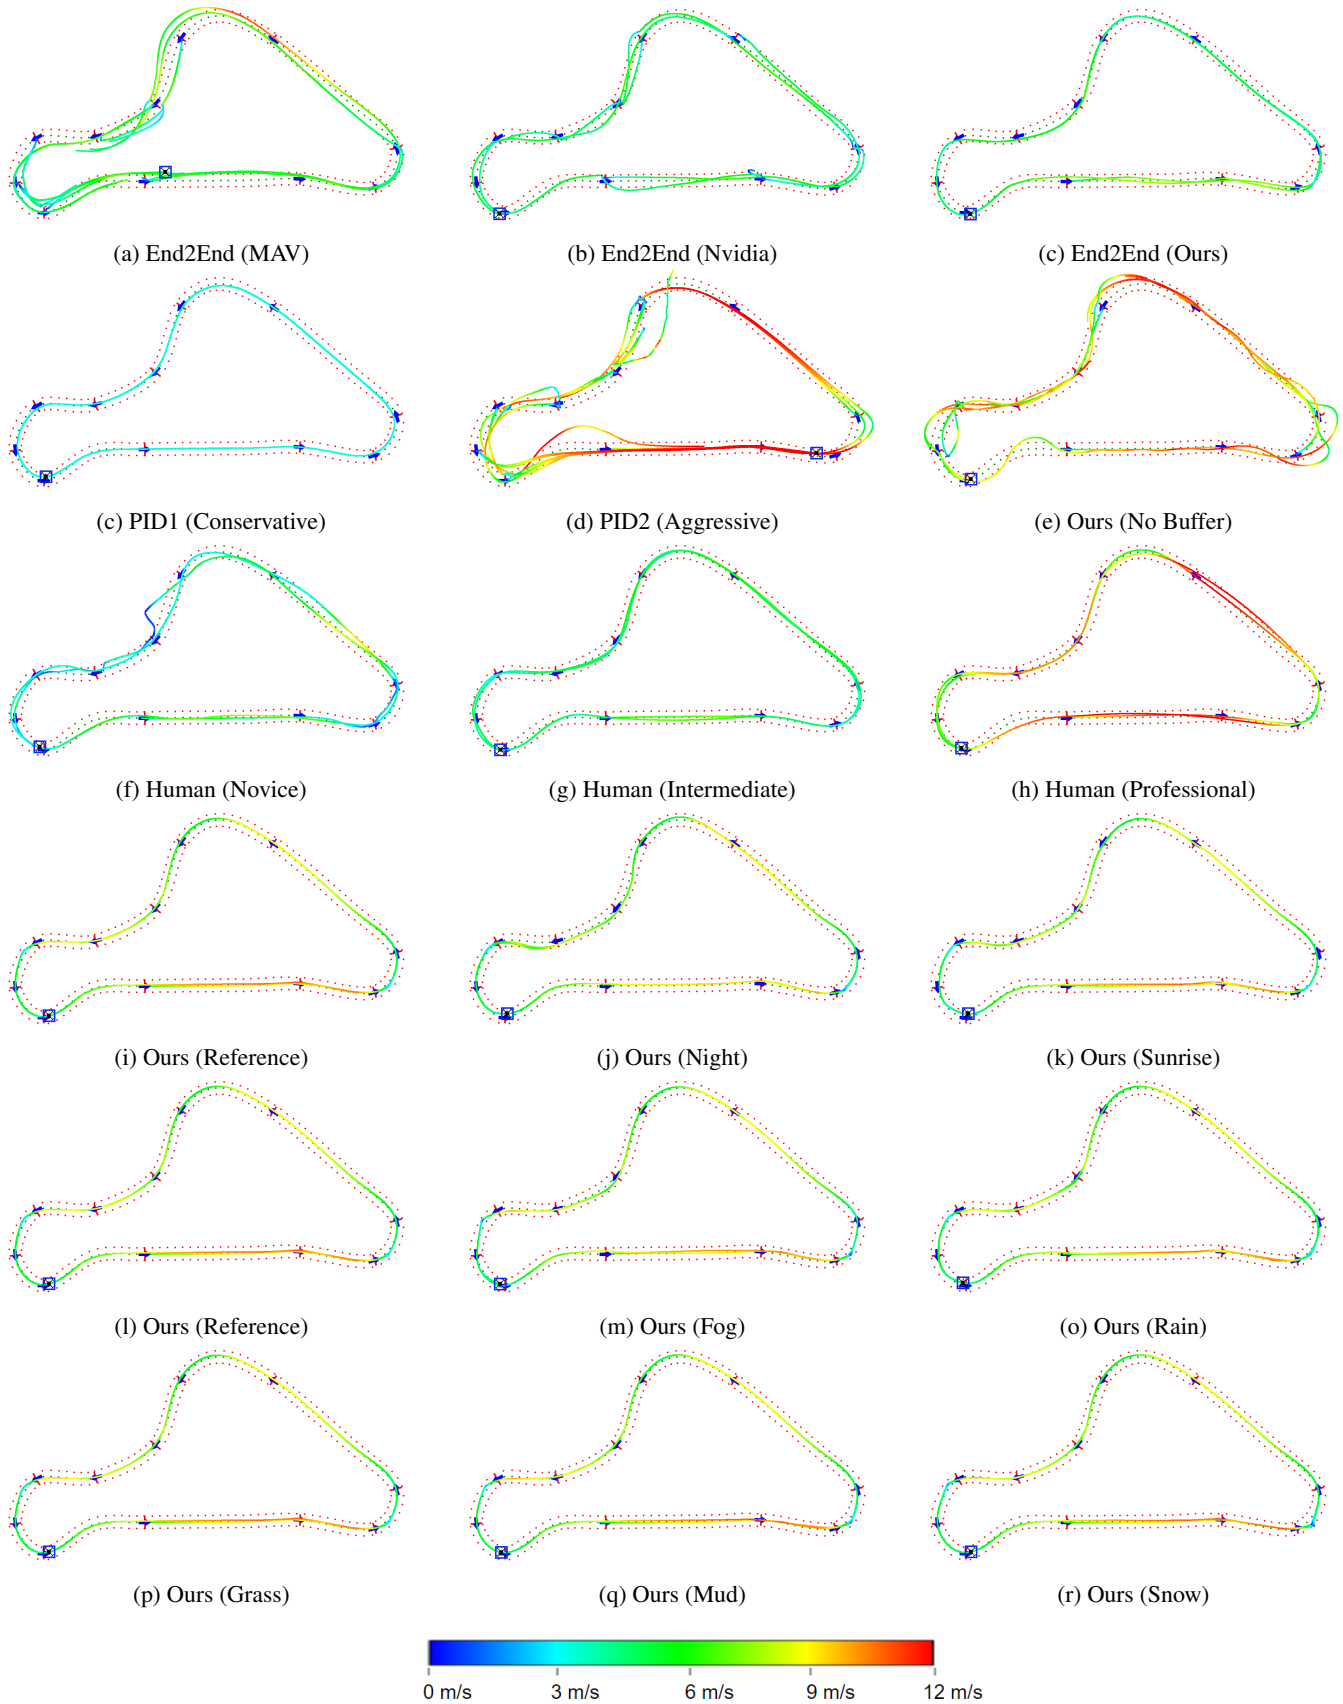

Figure 3: Qualitative results on track3. The color encodes speed as a heatmap, where blue corresponds to the minimum speed and red to the maximum speed.

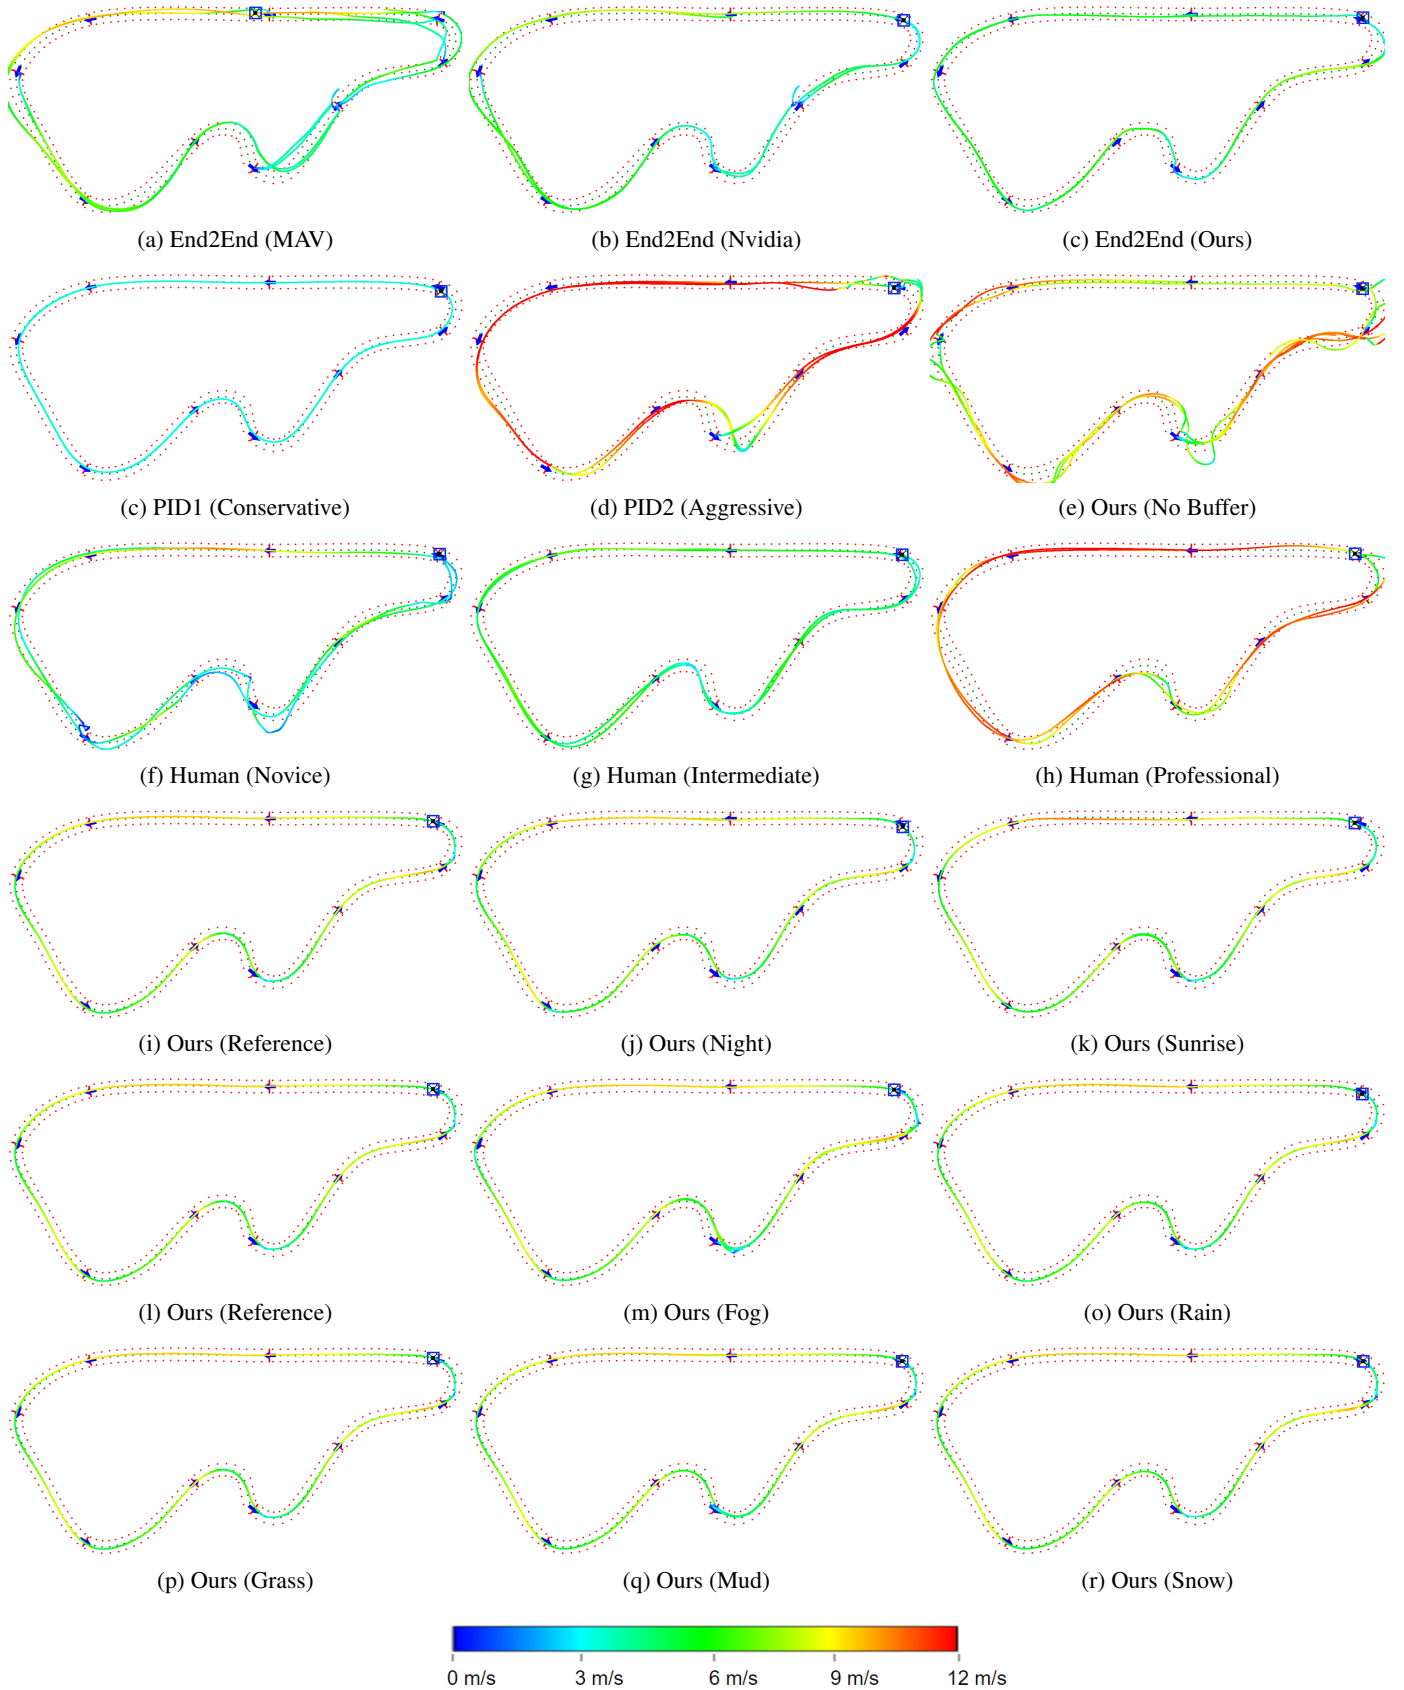

Figure 4: Qualitative results on track4. The color encodes speed as a heatmap, where blue corresponds to the minimum speed and red to the maximum speed.

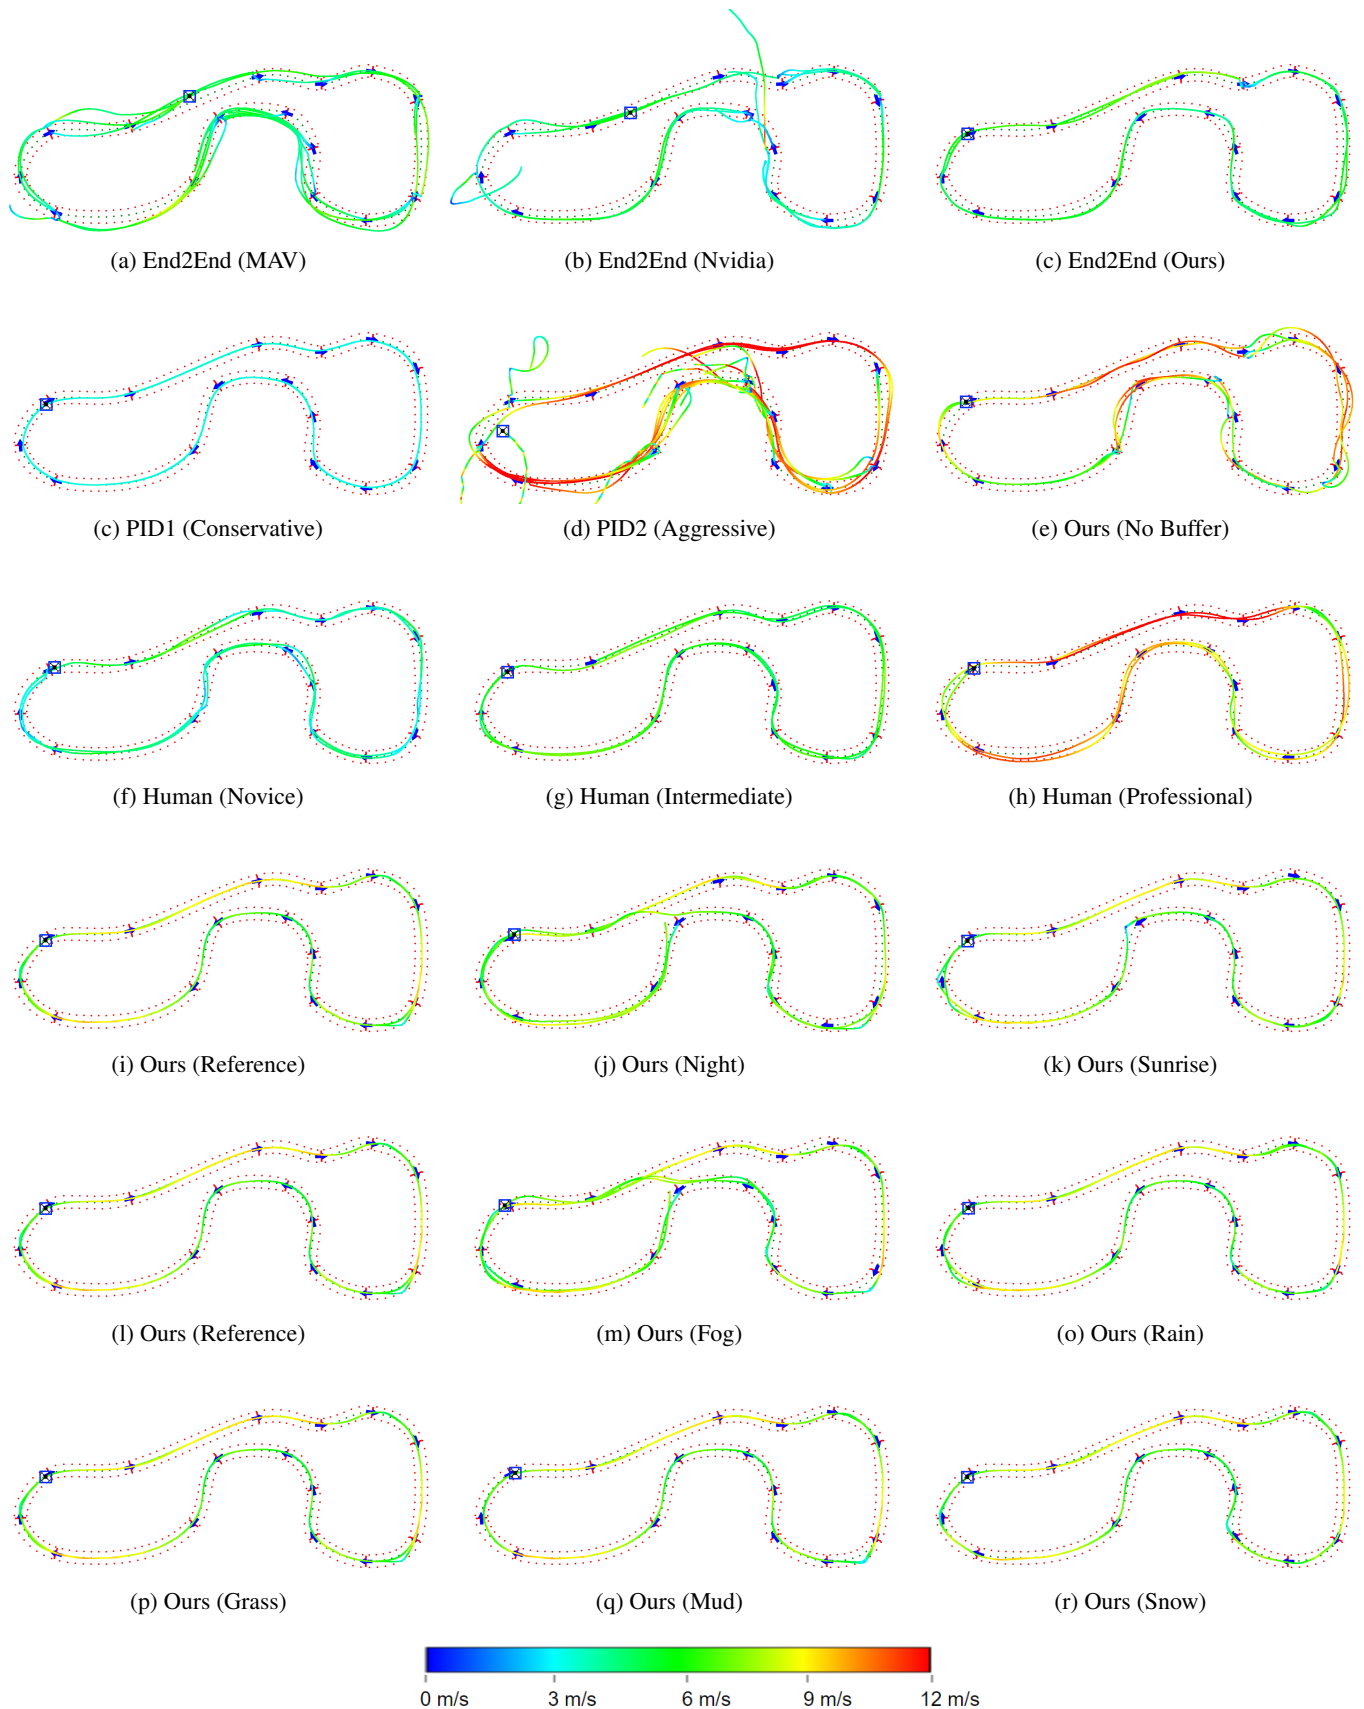

Figure 5: Qualitative results on track5. The color encodes speed as a heatmap, where blue corresponds to the minimum speed and red to the maximum speed.

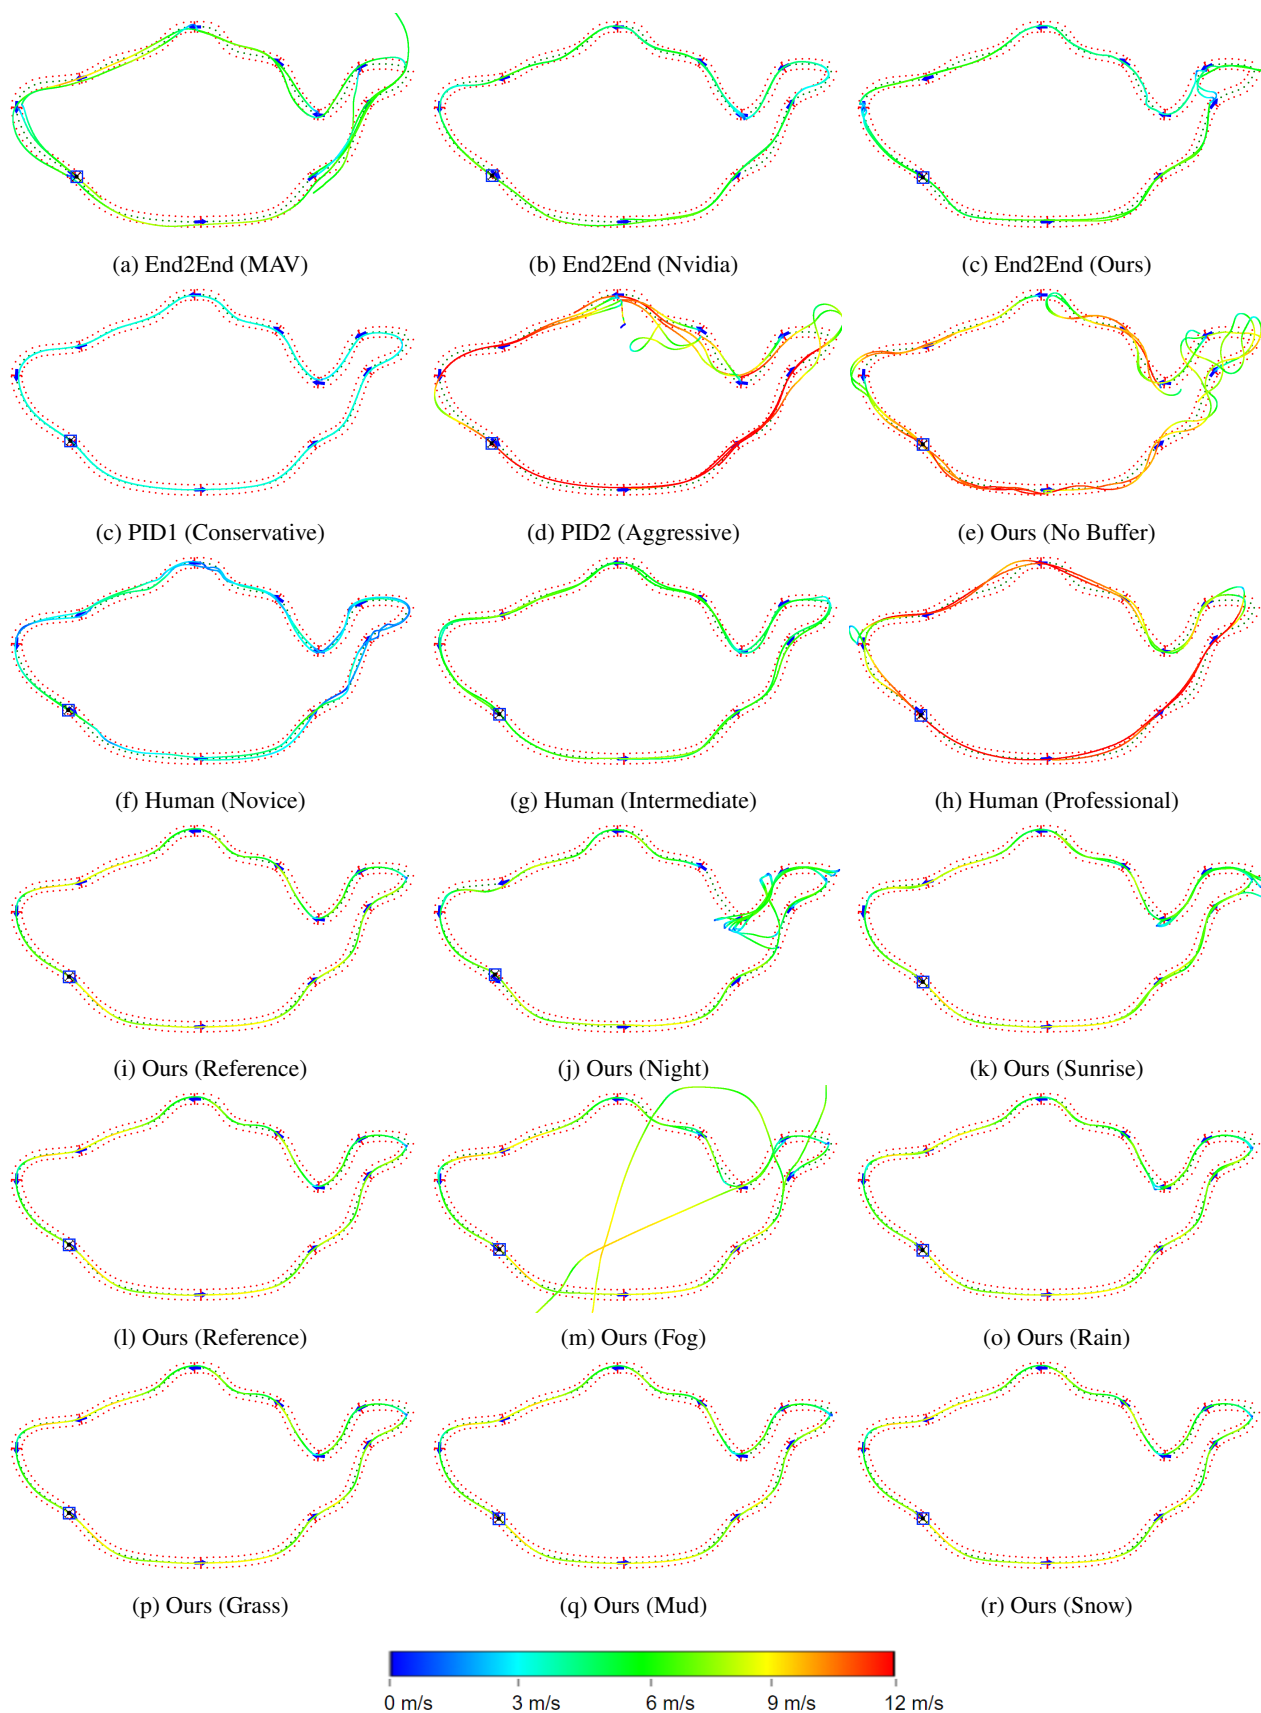

Figure 6: Qualitative results on track6. The color encodes speed as a heatmap, where blue corresponds to the minimum speed and red to the maximum speed.

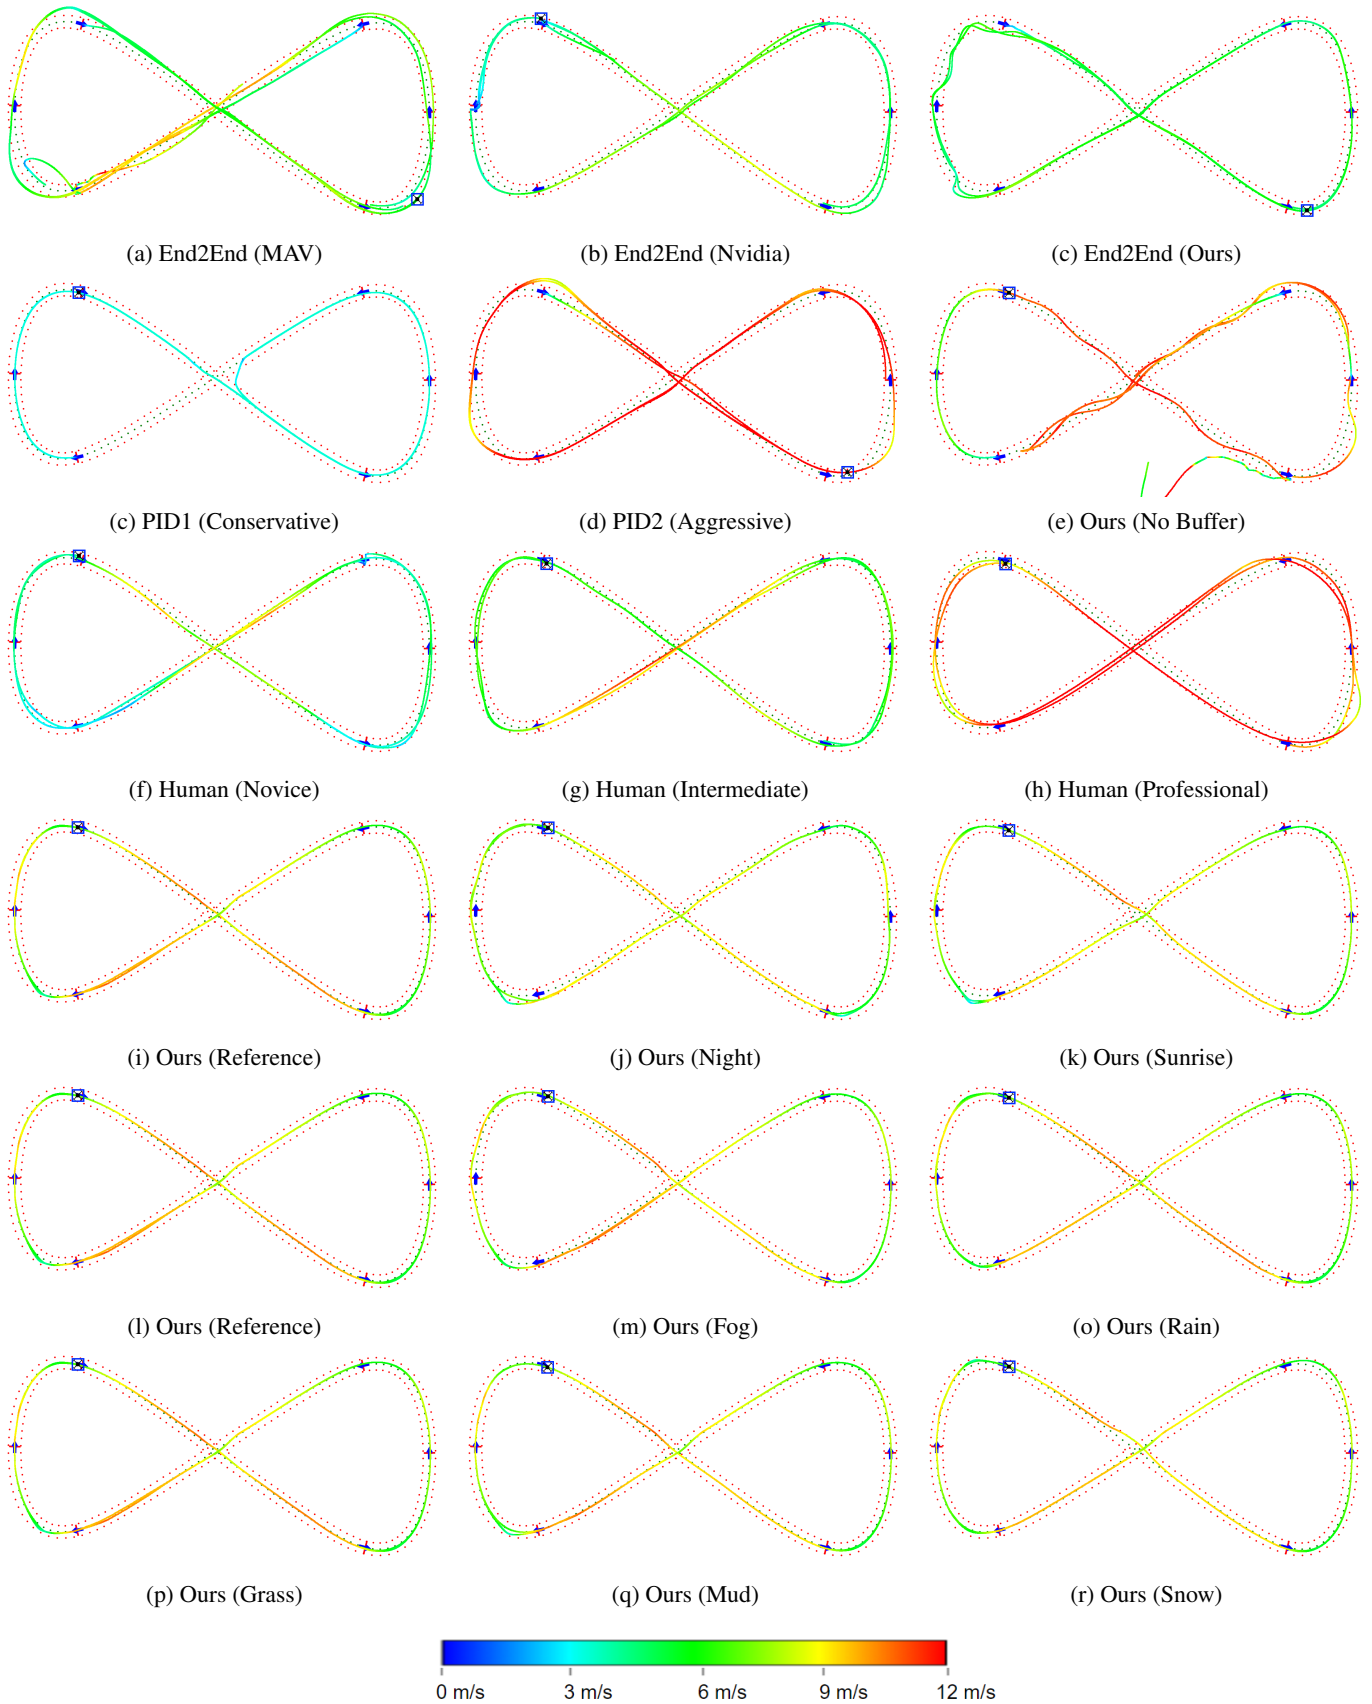

Figure 7: Qualitative results on track7. The color encodes speed as a heatmap, where blue corresponds to the minimum speed and red to the maximum speed.



Table 1: Adaptation with different weather and lighting conditions

|             | Ours (Fog) |        |        | Ours (Rain) |       |        | Ours (Sunrise) |        |        | Ours (Night) |        |        |
|-------------|------------|--------|--------|-------------|-------|--------|----------------|--------|--------|--------------|--------|--------|
|             | Score      | Time   | Resets | Score       | Time  | Resets | Score          | Time   | Resets | Score        | Time   | Resets |
| Track1      | 12/12      | 57.43  | 0      | 12/12       | 54.97 | 0      | 12/12          | 55.43  | 0      | 12/12        | 58.07  | 0      |
| Track2      | 20/20      | 67.75  | 0      | 20/20       | 67.27 | 0      | 20/20          | 66.50  | 0      | 20/20        | 69.33  | 0      |
| Track3      | 22/22      | 64.32  | 0      | 22/22       | 62.63 | 0      | 22/22          | 62.95  | 0      | 22/22        | 65.17  | 0      |
| Track4      | 17/18      | 93.02  | 1      | 18/18       | 72.42 | 0      | 18/18          | 70.95  | 0      | 18/18        | 72.23  | 0      |
| Track5      | 28/30      | 114.11 | 2      | 30/30       | 73.01 | 0      | 30/30          | 74.10  | 0      | 28/30        | 114.03 | 2      |
| Track6      | 17/20      | 136.71 | 3      | 20/20       | 84.92 | 0      | 19/20          | 118.89 | 1      | 17/20        | 154.74 | 3      |
| Track7      | 12/12      | 65.03  | 0      | 12/12       | 65.58 | 0      | 12/12          | 67.72  | 0      | 12/12        | 68.58  | 0      |
| <b>Avg.</b> | 95.52%     | 85.48  | 0.86   | 100%        | 68.68 | 0      | 99.25%         | 73.77  | 0.14   | 96.27%       | 86.01  | 0.71   |

Table 2: Adaptation with different textures

|             | Ours (Grass) |       |        | Ours (HD Grass) |       |        | Ours (Mud) |       |        | Ours (Snow) |       |        |
|-------------|--------------|-------|--------|-----------------|-------|--------|------------|-------|--------|-------------|-------|--------|
|             | Score        | Time  | Resets | Score           | Time  | Resets | Score      | Time  | Resets | Score       | Time  | Resets |
| Track1      | 12/12        | 52.20 | 0      | 12/12           | 56.07 | 0      | 12/12      | 53.45 | 0      | 12/12       | 55.13 | 0      |
| Track2      | 20/20        | 64.75 | 0      | 20/20           | 66.98 | 0      | 20/20      | 65.28 | 0      | 20/20       | 64.84 | 0      |
| Track3      | 22/22        | 62.00 | 0      | 22/22           | 64.05 | 0      | 22/22      | 62.03 | 0      | 22/22       | 64.06 | 0      |
| Track4      | 18/18        | 71.93 | 0      | 18/18           | 75.57 | 0      | 18/18      | 73.57 | 0      | 18/18       | 72.18 | 0      |
| Track5      | 30/30        | 71.16 | 0      | 30/30           | 73.78 | 0      | 30/30      | 71.20 | 0      | 30/30       | 73.28 | 0      |
| Track6      | 20/20        | 81.66 | 0      | 20/20           | 85.77 | 0      | 20/20      | 82.21 | 0      | 20/20       | 82.31 | 0      |
| Track7      | 12/12        | 64.86 | 0      | 12/12           | 66.01 | 0      | 12/12      | 65.03 | 0      | 12/12       | 65.99 | 0      |
| <b>Avg.</b> | 100%         | 66.94 | 0      | 100%            | 69.75 | 0      | 100%       | 67.54 | 0      | 100%        | 68.26 | 0      |
