# Supplementary material
Source: ML conference proceedings conference paper supplement (https://openaccess.thecvf.com/content/CVPRW_2019/html/Muller_Learning_a_Controller_CVPRW_2019_paper.html)
Supplement: Supplementary file 2 [file Muller_Learning_a_Controller_CVPRW_2019_supplemental.zip]

Archive with 2 entries (2 files):
- 13-supp.mp4
- 13-supp.pdf
